## Corrigendum

Reese, S. A., Ultsch, G. R. and Jackson, D. C. (2004). Lactate accumulation, glycogen depletion, and shell composition of hatchling turtles during simulated aquatic hibernation. *J. Exp. Biol.* **207**, 2889-2895.

In Fig. 3, the ratio of shell CO<sub>2</sub> to whole-body lactate for adult *Chrysemys picta bellii* was calculated incorrectly. Recalculating the ratio using the correct numbers yielded a smaller ratio, although it does not change any of the conclusions presented in the text. The figure is reprinted below; no changes have been made to the text.

The authors apologise for any inconvenience this may have caused.

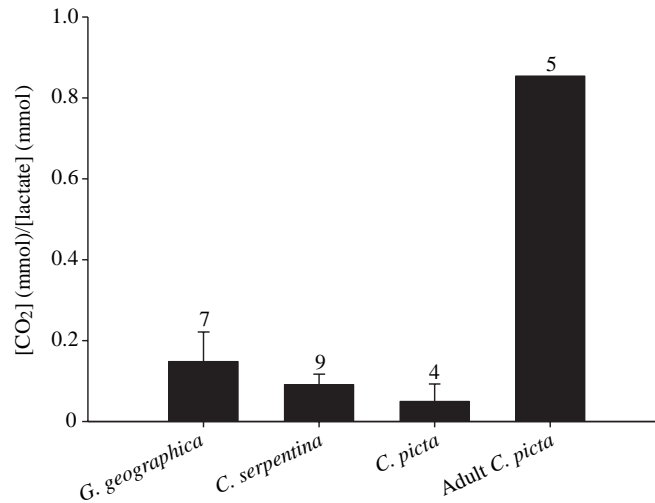

Fig. 3. Shell CO<sub>2</sub> mobilization (mean ± S.E.M.) as a function of whole-body lactate for hatchling *Chelydra serpentina*, *Chrysemys picta bellii* and *Graptemys geographica* and adult *Chrysemys picta bellii* submerged in anoxic water at 3°C. Sample sizes are listed above the bars. Data for adult *Chrysemys picta bellii* are from Warburton and Jackson (1995).
